# Supplementary material
Source: PubMed Central journal article supplement (PMC7482115)
Supplement: Supp_FigS1.pdf [file Supp_FigS1.pdf]

## Supplementary Data

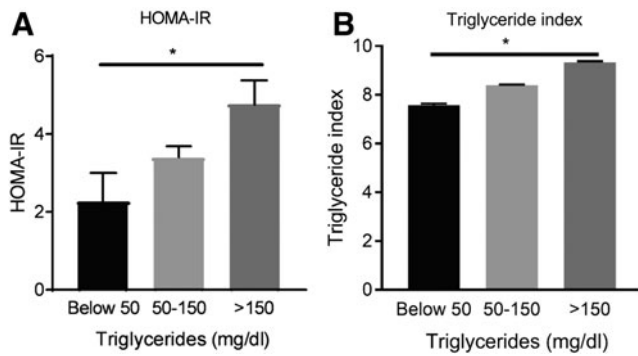

**SUPPLEMENTARY FIG. S1.** Measures of insulin resistance based on fasting plasma triglycerides. Triglycerides were categorized as <50, 50–150, and >150 mg/dL. **(A)** The mean SD of HOMA-IR was significantly different between the three groups. **(B)** The mean SD of triglyceride index was significantly different between the three groups.  $p < .05$ , one-way ANOVA. ANOVA, analysis of variance; HOMA-IR, homeostatic model assessment-insulin resistance; SD, standard deviation.
